# Supplementary material for: Impact of Lipoprotein(a) Levels on Perioperative Outcomes in Cardiac Surgery
Source: MDPI journal article supplement (doi:10.3390/cells10112829), 2021-10-21
Supplement: s1 [file s1]

Table S1. Missing data.

| <i>Variable</i>                 | <i>Number of missing values (% of total)</i> |
|---------------------------------|----------------------------------------------|
| Age (yr)                        | 0 (0.00%)                                    |
| Height (cm)                     | 0 (0.00%)                                    |
| Weight (kg)                     | 0 (0.00%)                                    |
| BMI (kg/m <sup>2</sup> )        | 0 (0.00%)                                    |
| Sex                             | 0 (0.00%)                                    |
| Diabetes                        | 0 (0.00%)                                    |
| Diabetes on insulin             | 157 (81.8%)                                  |
| Hypertension                    | 2 (1.04%)                                    |
| Dyslipidaemia                   | 1 (0.52%)                                    |
| Nicotine                        | 4 (2.08%)                                    |
| Adipositas                      | 0 (0.00%)                                    |
| Preoperative renal disease      | 0 (0.00%)                                    |
| Peripheral vascular disease     | 14 (7.29%)                                   |
| Carotid disease                 | 21 (10.9%)                                   |
| Myocardial infarction           | 1 (0.52%)                                    |
| COPD                            | 2 (1.04%)                                    |
| NYHA                            | 1 (0.52%)                                    |
| CCS                             | 3 (1.56%)                                    |
| Ejection fraction               | 1 (0.52%)                                    |
| EuroSCORE2                      | 8 (4.17%)                                    |
| Logistic EuroSCORE              | 5 (2.60%)                                    |
| Aortic valve                    | 0 (0.00%)                                    |
| Mitral valve                    | 0 (0.00%)                                    |
| Tricuspid valve                 | 0 (0.00%)                                    |
| Coronary Artery Bypass          | 0 (0.00%)                                    |
| Ascending Aortic                | 0 (0.00%)                                    |
| Aortic Arch                     | 0 (0.00%)                                    |
| Cholesterol (mmol/L)            | 0 (0.00%)                                    |
| HDL cholesterol(mmol/L)         | 0 (0.00%)                                    |
| LDL Cholesterol (mmol/L)        | 0 (0.00%)                                    |
| Quotient overall (.)            | 0 (0.00%)                                    |
| Triglycerides (mmol/L)          | 0 (0.00%)                                    |
| Lipoprotein(a) (mg/dl)          | 0 (0.00%)                                    |
| ECC or MiECC                    | 0 (0.00%)                                    |
| Bypass time (min)               | 0 (0.00%)                                    |
| Aortic cross clamping (min)     | 0 (0.00%)                                    |
| Lowest body temperature (deg C) | 0 (0.00%)                                    |
| Deep hypothermic cardiac arrest | 1 (0.52%)                                    |
| Operation duration (min)        | 0 (0.00%)                                    |

**Table S2.** Sensitivity analysis of the primary outcomes with regard to the Lp(a) threshold. Unadjusted *P* values are shown.

| <i>Threshold value</i>                  | <b>15 mg/dL</b> | <b>20 mg/dL</b> | <b>25 mg/dL</b> | <b>30 mg/dL</b> | <b>35 mg/dL</b> | <b>40 mg/dL</b> | <b>45 mg/dL</b> | <b>50 mg/dL</b> |
|-----------------------------------------|-----------------|-----------------|-----------------|-----------------|-----------------|-----------------|-----------------|-----------------|
| <b>Postoperative stroke<sup>†</sup></b> | 0.558           | 0.773           | 0.540           | 0.370           | >0.99           | >0.99           | 0.732           | >0.99           |
| <b>30-day mortality</b>                 | 0.491           | 0.506           | 0.522           | 0.534           | 0.559           | 0.584           | >0.99           | >0.99           |
| <b>1 Year follow-up<sup>‡</sup></b>     | 0.455           | 0.468           | 0.698           | 0.716           | >0.99           | 0.452           | 0.690           | 0.699           |

**Table S3.** Multivariable linear regression of the ratio of postoperative Lp(a) values to preoperative Lp(a) values (in percent) on several surgical characteristics. Note that Lp(a) values below the measurement accuracy (< 2 mg/dl) were excluded from the analysis.

|                                            | Coefficient | 95% CI <sup>1</sup> | P      |
|--------------------------------------------|-------------|---------------------|--------|
| <b>ECC or MiECC</b>                        |             |                     |        |
| ECC                                        | —           | —                   |        |
| MiECC                                      | 11          | -3.8, 25            | 0.15   |
| <b>Aortic cross clamping</b> (hours)       | 0.78        | -12, 14             | >0.9   |
| <b>Lowest body temperature</b> (degrees C) | -3.9        | -7.8, 0.02          | 0.051  |
| <b>Deep hypothermic cardiac arrest</b>     |             |                     |        |
| No                                         | —           | —                   |        |
| Yes                                        | -35         | -68, -2.2           | 0.037  |
| <b>Operation duration</b> (hours)          | -12         | -19, -5.0           | <0.001 |

<sup>1</sup>CI = Confidence Interval.

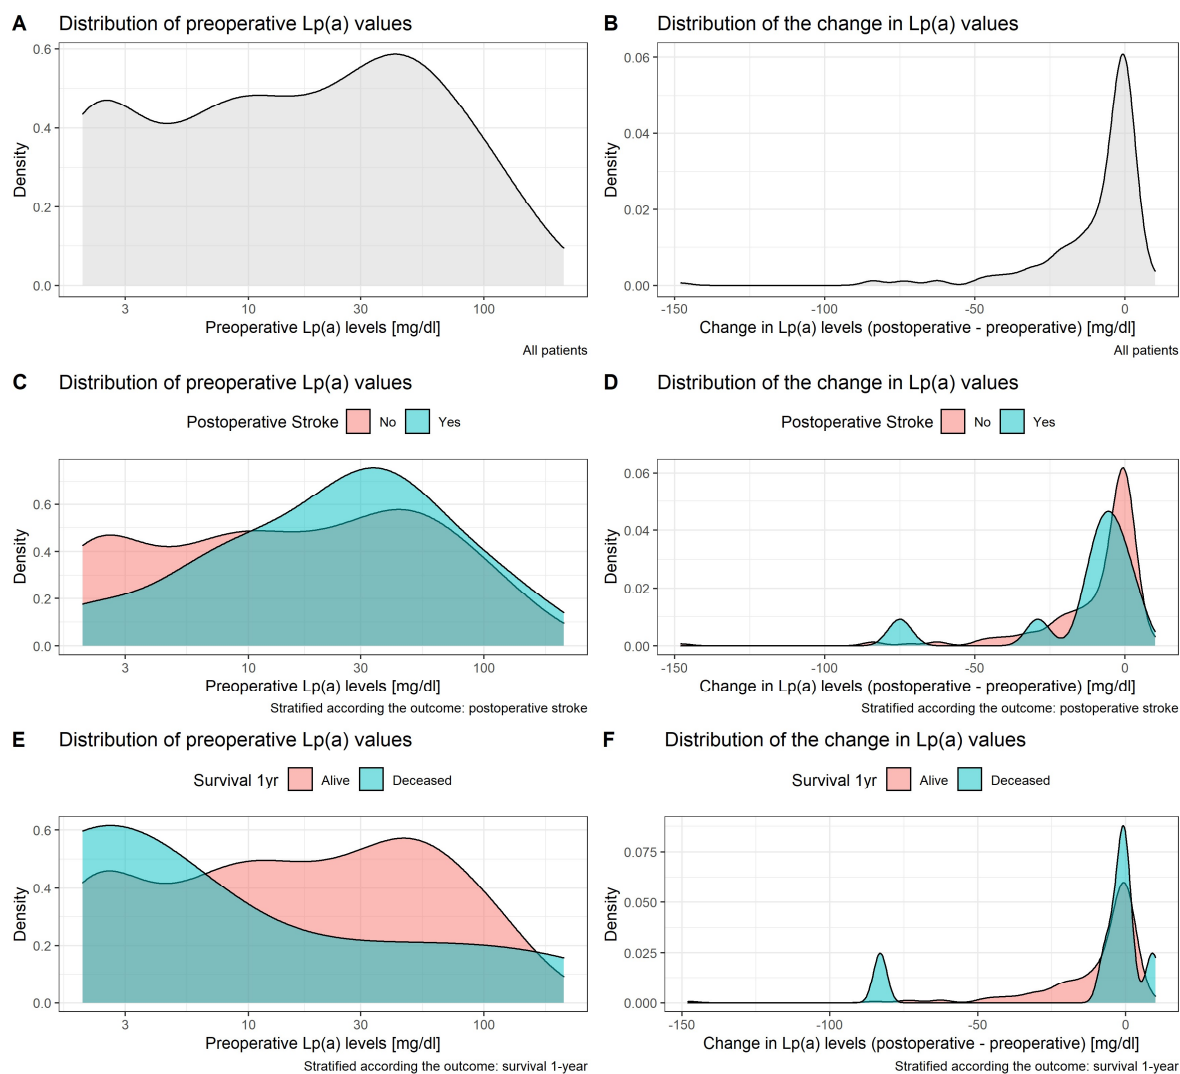

**Figure S1.** Kernel density distributions of preoperative Lp(a) values (on the log-scale) and their changes (original scale) for all patients (panels A-B), stratified according to the outcome postoperative stroke (C-D) and stratified according to 1-year survival (E-F).
